# Supplementary material
Source: PubMed Central journal article supplement (PMC3608700)
Supplement: NIHMS431569-supplement-07.pdf [file NIHMS431569-supplement-07.pdf]

**A**

| <b>Gene</b>    | <b>Forward</b>                 | <b>Reverse</b>               |
|----------------|--------------------------------|------------------------------|
| <i>Hmox1</i>   | 5'-acccacaaggactcaaggac-3'     | 5'-atggggctatcagggagtagag-3' |
| <i>Il12b</i>   | 5'-cgcaagaaagaaaagatgaaggag-3' | 5'-ttgcattggacttcggtagatg-3' |
| <i>Tnf</i>     | 5'-ggtgatcgggtcccaacaagga-3'   | 5'-cacgctggctcagccactc-3'    |
| <i>β-Actin</i> | 5'-agccatgtacgtagccatccag-3'   | 5'-tggcgtgagggagagcatag-3'   |
| <i>Nqo1</i>    | 5'-cattctgaaaggctggttga-3'     | 5'-ctagcttgatctggtgtcag-3'   |
| <i>Gclc</i>    | 5'-acaagcaccctcgctcggg-3'      | 5'-ctccaggcctctctcctccc-3'   |
| <i>Fth1</i>    | 5'-gatcaacctggagttgatgcc-3'    | 5'-gatattctgccatgccagcttc-3' |
| <i>Txnrd1</i>  | 5'-ctgactcccgtagccatcca-3'     | 5'-caaagccctgcgtcacctct-3'   |

**B**

| <b>Gene</b>  | <b>Forward</b>               | <b>Reverse</b>             |
|--------------|------------------------------|----------------------------|
| <i>hmox1</i> | 5'-ccacgtcagagctgaaaaca-3'   | 5'-agcgctcggtagatctcgta-3' |
| <i>gstp1</i> | 5'-ctaggagcagcttgaaacgcac-3' | 5'-tggccagaacatttcaaagc-3' |
| <i>rpl32</i> | 5'-ccctaccaaacctgaagtcgt-3'  | 5'-ctccagttgccctgatcttg-3' |

**C**

| <b>Gene</b>        | <b>Forward</b>            | <b>Reverse</b>            |
|--------------------|---------------------------|---------------------------|
| Bacterial 16S rRNA | 5'-gtgstgcayggytgcgtca-3' | 5'-acgtrtccmcaccttcctc-3' |
