# Supplementary material
Source: PubMed Central journal article supplement (PMC3608700)

**A**

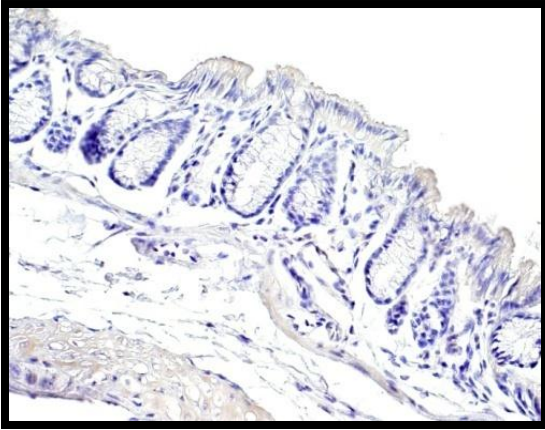

**WT GF**

**B**

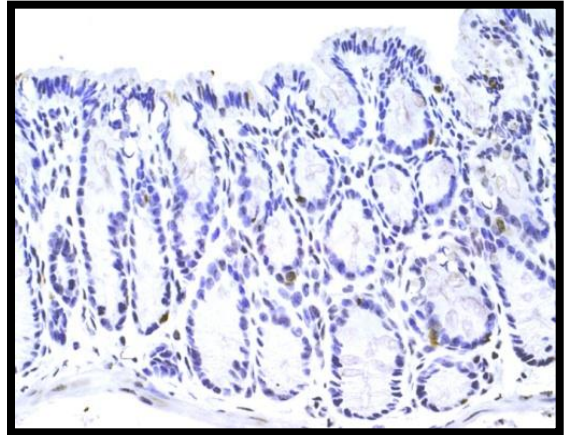

***Il10*<sup>-/-</sup> GF**

**C**

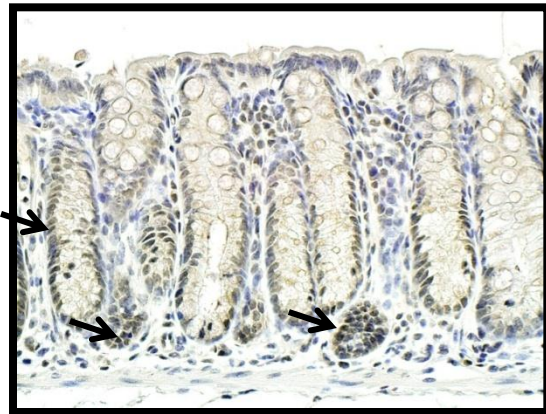

**WT CNV**

**D**

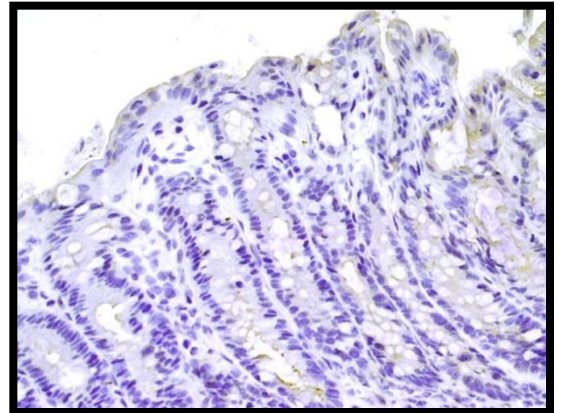

***Il10*<sup>-/-</sup> CNV**

**E**

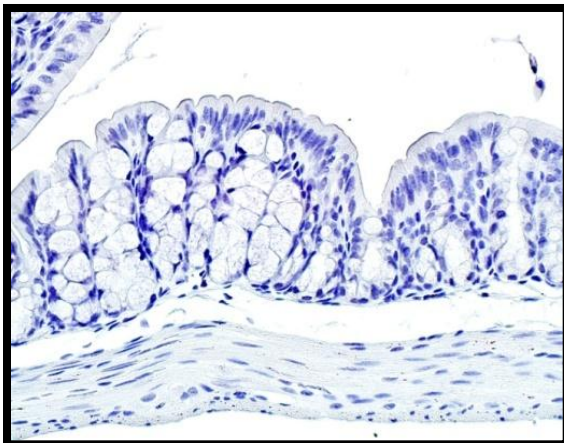

**WT CNV (IgG Isotype)**

Supplement: NIHMS431569-supplement-01.pdf [file NIHMS431569-supplement-01.pdf]

**A**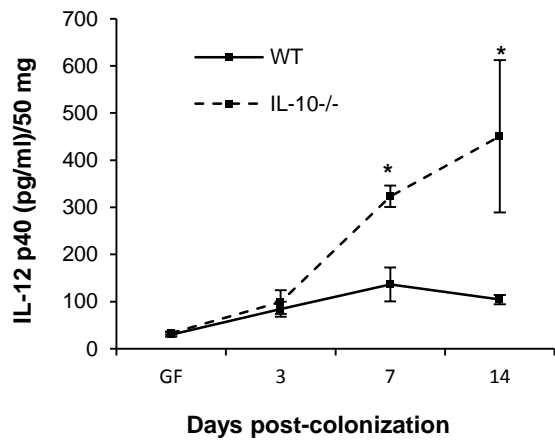**B**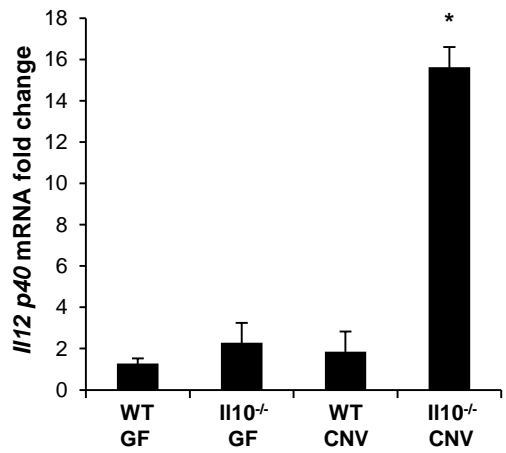**C**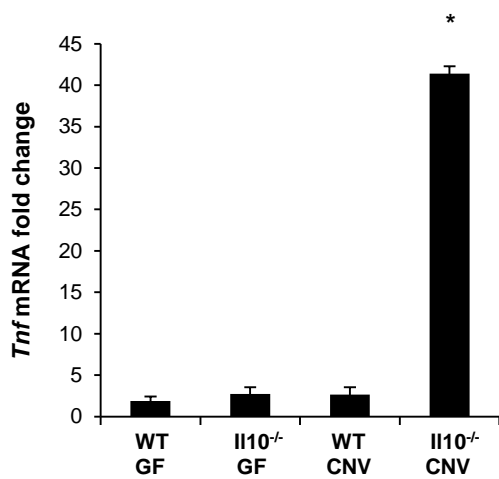

Supplement: NIHMS431569-supplement-02.pdf [file NIHMS431569-supplement-02.pdf]

**A**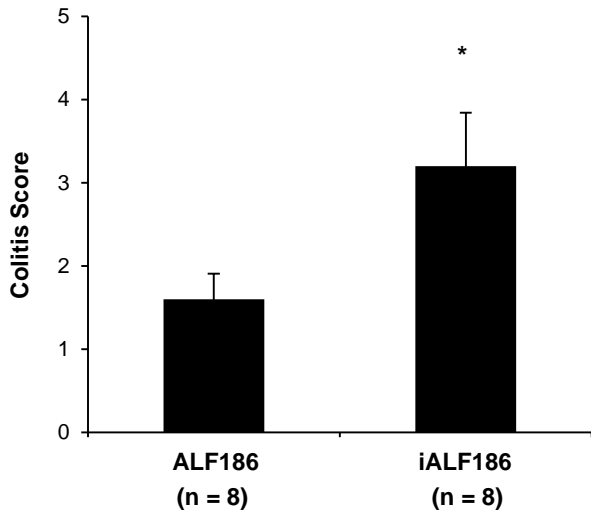**B**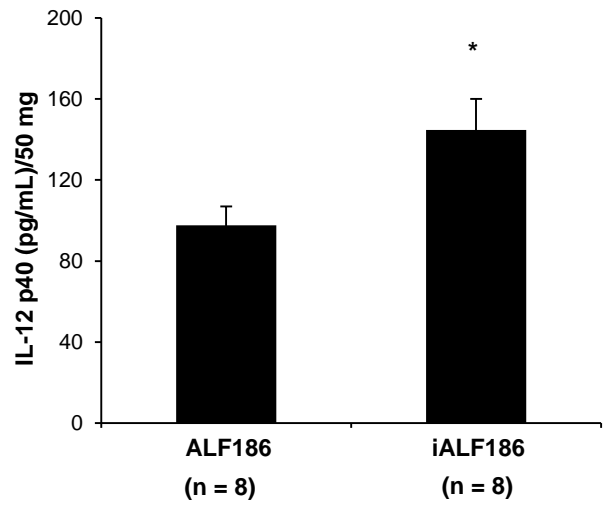

Supplement: NIHMS431569-supplement-03.pdf [file NIHMS431569-supplement-03.pdf]

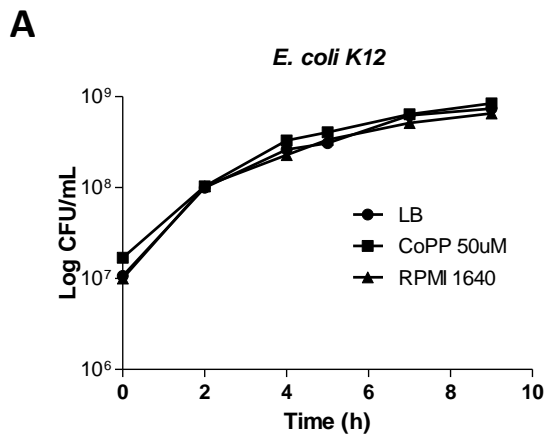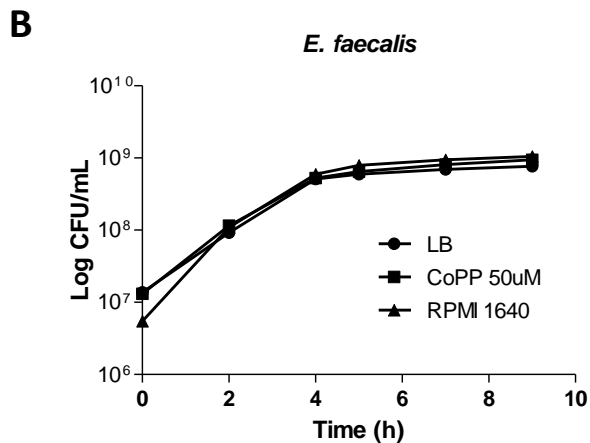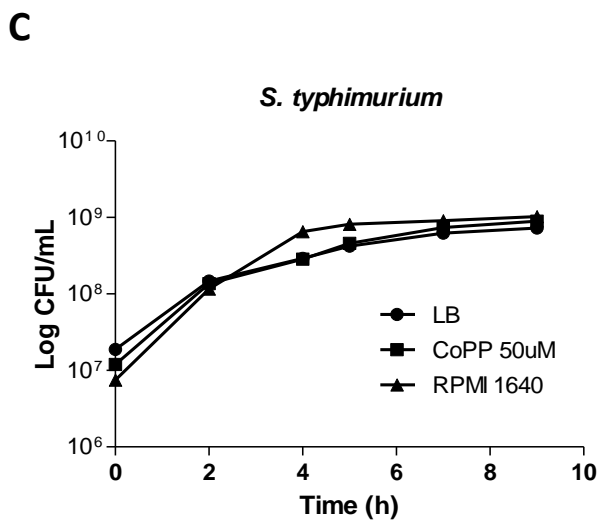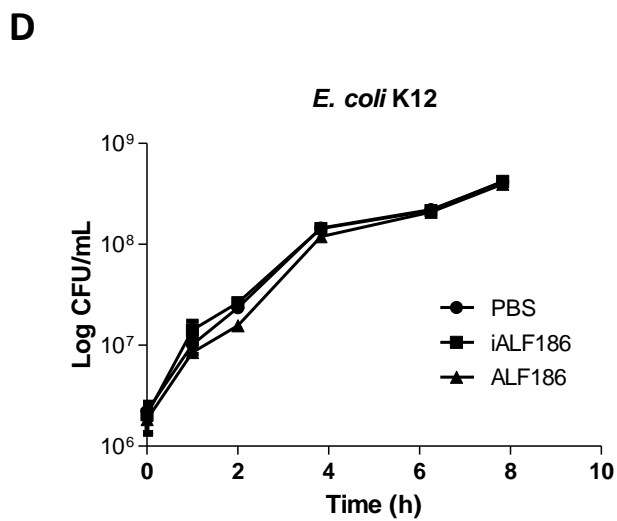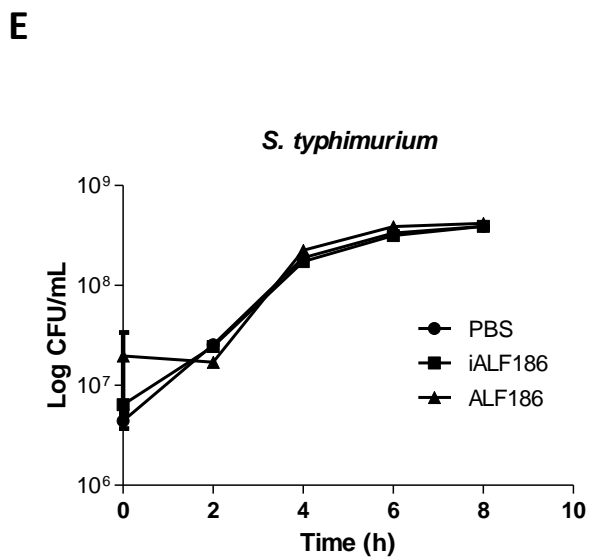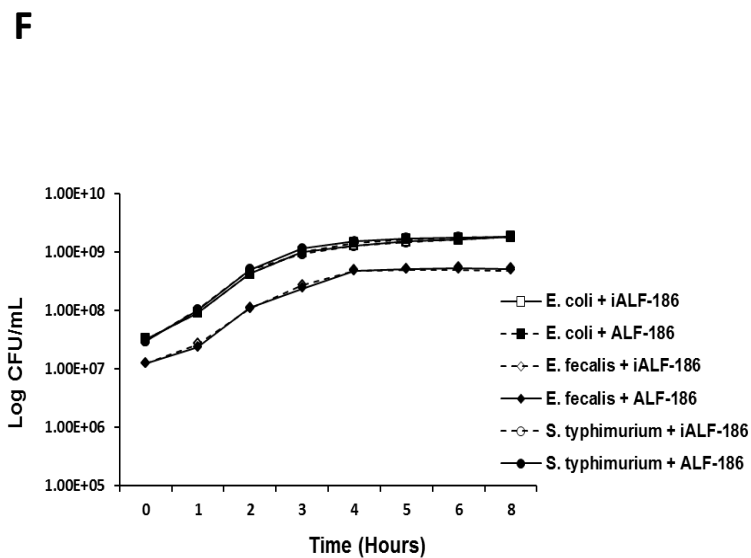

Supplemental Figure 4

Supplement: NIHMS431569-supplement-04.pdf [file NIHMS431569-supplement-04.pdf]

**A**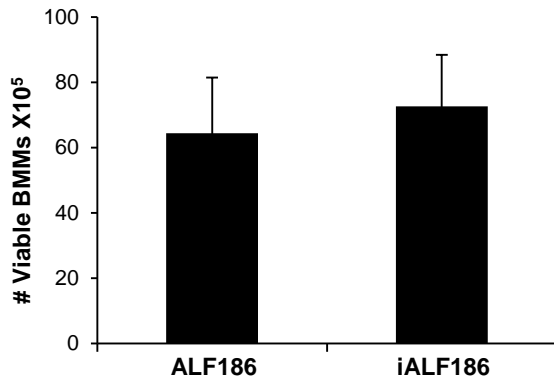**B**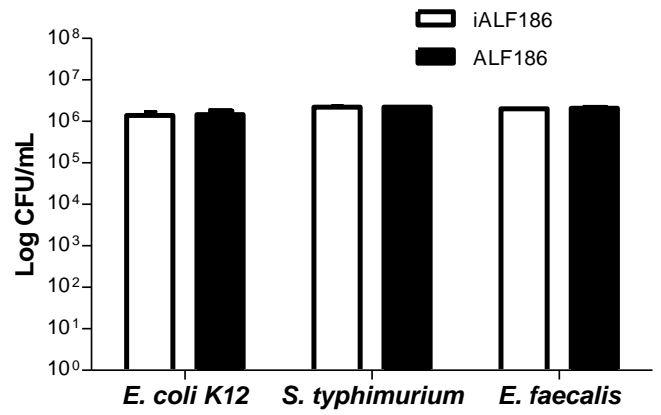**C**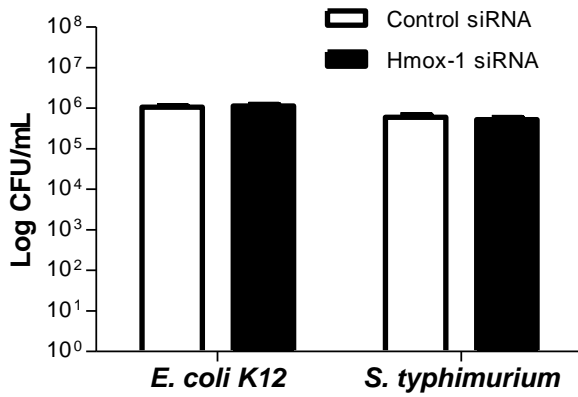**D**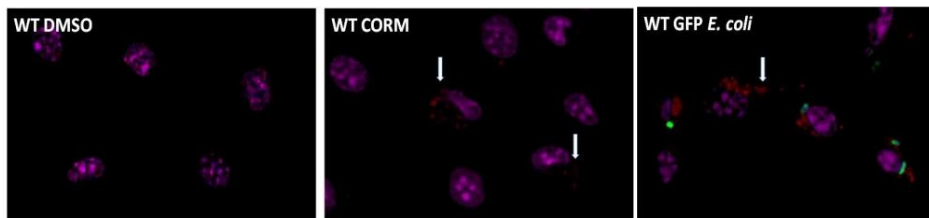

Phagolysosome = red, Nuclei = magenta, eGFP-*E. coli* = green

Supplement: NIHMS431569-supplement-05.pdf [file NIHMS431569-supplement-05.pdf]

**A**

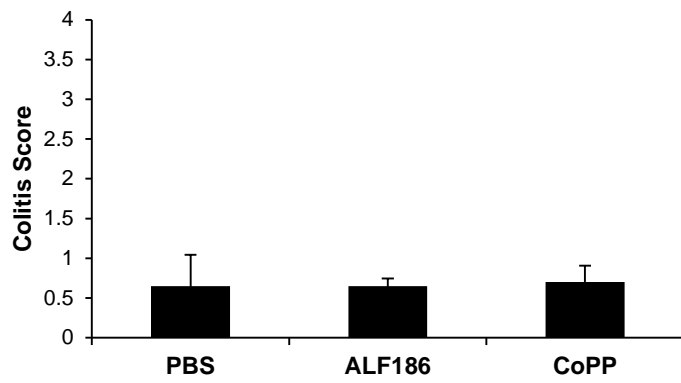

**B**

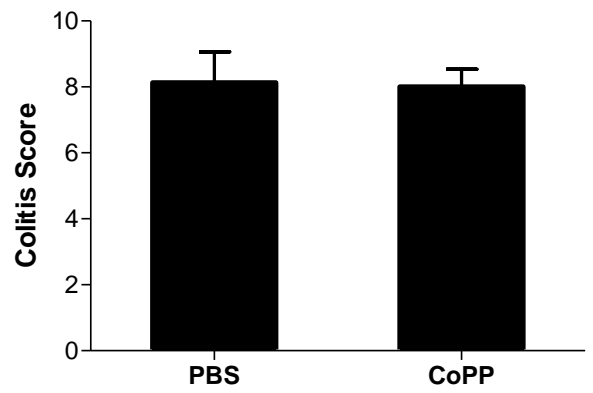

Supplement: NIHMS431569-supplement-06.pdf [file NIHMS431569-supplement-06.pdf]
